# Supplementary material for: Radio frequency heating and material processing using carbon susceptors
Source: PubMed Central journal article supplement (PMC9419054; doi:10.1039/d1na00217a), 2021-07-30
Supplement: NA-003-D1NA00217A-s001.pdf [file NA-003-D1NA00217A-s001.pdf]

## Supporting Information

### Radio Frequency Heating and Material Processing Using Carbon Susceptors

Aniruddh Vashisth<sup>1\*</sup>, Shegufta T. Upama<sup>2,3</sup>, Muhammad Anas<sup>2</sup>, Ju-Hyun Oh<sup>2</sup>, Nutan Patil<sup>2</sup>, Micah J. Green<sup>2,3</sup>

<sup>1</sup>Department of Mechanical Engineering, University of Washington, Seattle, WA, USA

<sup>2</sup>Artie McFerrin Department of Chemical Engineering, Texas A&M University, College Station, TX, USA

<sup>3</sup>Department of Materials Science & Engineering, Texas A&M University, College Station, TX, USA

\*corresponding author: [vashisth@uw.edu](mailto:vashisth@uw.edu)

**Table S1:** Reported heating response of carbonaceous materials on exposure to RF fields and its applications.

| RF Susceptor      | Embedding Medium    | Input power (W)/ Frequency (MHz) | Max reported dT/dt (°C/s) or Max T (°C) @ SS | Application [Reference]                    |
|-------------------|---------------------|----------------------------------|----------------------------------------------|--------------------------------------------|
| MWCNT (0.1-10wt%) | Polylactic acid     | 10 W /1-200 MHz (Fringing Field) | 16 °C/s                                      | Bonding <sup>1</sup>                       |
| s-SWCNT           | DOC                 | 1 W/60–70 MHz                    | 25.6 °C/s                                    | Film purity <sup>2</sup>                   |
| m-SWCNT           | DOC                 |                                  | 10.4 °C/s                                    |                                            |
| m-SWCNT           | SDS                 |                                  | 1.51 °C/s                                    |                                            |
| MWCNT (3 wt%)     | Polycarbosilane     | 100 W/76–78 MHz                  | 600 °C (SS)                                  | Ceramic Precursor curing <sup>3</sup>      |
| MWCNT (0.1 wt%)   | Polycaprolactone    | 50 W/110 MHz                     | 2 °C/s                                       | Heating Fibers <sup>4</sup>                |
| LIG               | None                | 10 W/100-120 MHz                 | 21–122 °C/s                                  | Welding Polymers <sup>5</sup>              |
| SiC fiber         | N/A                 | 30 W/100 MHz                     | 400 °C (SS)                                  | Catalytic Reactor <sup>6</sup>             |
| GO                | None                | 5 W/107-108 MHz                  | 10.9 °C/s                                    | GO reduction <sup>7</sup>                  |
| GO (15 wt%)       | Polyvinyl Alcohol   |                                  | 1.5 °C/s                                     |                                            |
| Carbon Tape       | None                | 25 W/101 MHz                     | 208 °C (SS)                                  | Thermal actuator <sup>8</sup>              |
| LIG               |                     | 63 W/101 MHz                     | 202 °C (SS)                                  |                                            |
| Carbon Fibers     | Epoxy               | 25 W/ 66 MHz                     | 70 °C/s                                      | Curing CF composites <sup>9</sup>          |
| CB                | Structural Adhesive | 10 W/ 138 MHz                    | 1 °C/s                                       | Adhesive bonding of metals <sup>10</sup>   |
| CB                | Structural Adhesive | 100 W/114 MHz                    | ~3.5 °C/s                                    | Adhesive bonding of plastics <sup>11</sup> |
| Graphene          | None                | 5 W/ 70–130 MHz                  | Up to 25 °C/s                                | Identify type of graphene <sup>12</sup>    |
| PAN films         | None                | 30 W/ 106 MHz                    | 280 °C (SS)                                  | Crosslinking <sup>13</sup>                 |

SS: Steady state; dT/dt: (change in Temperature)/(change in time); MWCNTs: Multi-wall carbon nanotubes; m- or s-SWCNTs: metallic or semiconducting Single-wall carbon nanotubes; GO: Graphene oxide; LIG: Laser induced graphene; SiC: Silicon carbide; CB: Carbon black; SDC: Sodium dodecyl sulfate; DOC: Sodium deoxycholate

## References

- (1) Sweeney, C. B.; Moran, A. G.; Gruener, J. T.; Strasser, A. M.; Pospisil, M. J.; Saed, M. A.; Green, M. J. Radio Frequency Heating of Carbon Nanotube Composite Materials. *Acs Appl Mater Inter* **2018**, *10*, 27252-27259.
- (2) Anas, M.; Zhao, Y.; Saed, M. A.; Ziegler, K. J.; Green, M. J. Radio frequency heating of metallic and semiconducting single-walled carbon nanotubes. *Nanoscale* **2019**, *11*, 9617-9625.
- (3) Patil, N.; Camacho, A. C.; Mishra, N. K.; Singhla, P.; Sweeney, C. B.; Saed, M. A.; Radovic, M.; Green, M. J. Radio Frequency and Microwave Heating of Pre ceramic Polymer Nanocomposites with Applications in Mold-Free Processing. *Adv Eng Mater* **2019**, *21*, 1900276.
- (4) Morikawa, K.; Vashisth, A.; Bansala, T.; Green, M. J.; Naraghi, M. Wire Melt Electrospun Polymer Nanocomposite Fibers as Radio Frequency Responsive Heaters. *ACS Applied Polymer Materials* **2019**, *1*, 2751-2759.
- (5) Gerringer, J. C.; Moran, A. G.; Habib, T.; Pospisil, M. J.; Oh, J. H.; Teipel, B. R.; Green, M. J. Radio Frequency Heating of Laser-Induced Graphene on Polymer Surfaces for Rapid Welding. *ACS Applied Nano Materials* **2019**, *2*, 7032-7042.
- (6) Patil, N.; Mishra, N. K.; Saed, M. A.; Green, M. J.; Wilhite, B. A. Radio Frequency Driven Heating of Catalytic Reactors for Portable Green Chemistry. *Advanced Sustainable Systems* **2020**, *n/a*, 2000095.
- (7) Debnath, D.; Zhao, X. F.; Anas, M.; Kulhanek, D. L.; Oh, J. H.; Green, M. J. Radio frequency heating and reduction of Graphene Oxide and Graphene Oxide - Polyvinyl Alcohol Composites. *Carbon* **2020**, *169*, 475-481.
- (8) Oh, J. H.; Anas, M.; Barnes, E.; Moores, L. C.; Green, M. J. Site-Specific Selective Bending of Actuators using Radio Frequency Heating. *Adv Eng Mater* **2021**, *n/a*, 2000873.
- (9) Vashisth, A.; Healey, R. E.; Pospisil, M. J.; Oh, J. H.; Green, M. J. Continuous processing of pre-pregs using radio frequency heating. *Compos Sci Technol* **2020**, *195*, 108211.
- (10) Vashisth, A., Auvil, T.J., Sophiea, D., Mastroianni, S.E., Green, M.J. Using Radio Frequency Fields for Local Heating and Curing of Adhesive for Bonding Metals. *(Submitted)* **2021**.
- (11) Gruener, J. T.; Vashisth, A.; Pospisil, M. J.; Camacho, A. C.; Oh, J.-H.; Sophiea, D.; Mastroianni, S. E.; Auvil, T. J.; Green, M. J. Local heating and curing of carbon nanocomposite adhesives using radio frequencies. *Journal of Manufacturing Processes* **2020**, *58*, 436-442.
- (12) Mason, M. J.; Coleman, B. J.; Saha, S.; Mustafa, M. M.; Green, M. J. Graphene signatures: Identifying graphite and graphene grades via radio frequency heating. *Carbon* **2021**, *182*, 564-570.
- (13) Patil, N.; Oh, J. H.; Khatri, S.; Saed, M. A.; Naraghi, M.; Green, M. J. Radio Frequency Heating Response of Polyacrylonitrile (PAN) Films and Nanofiber Mats. *ACS Applied Polymer Materials* **2021**, *3*, 3125-3130.
